# Supplementary material for: Elevated Expression and Activation of GPR15 in Immune Cells in Graves’ Disease
Source: MDPI journal article supplement (doi:10.3390/biom12121899), 2022-12-18
Supplement: s1 [file s1]

**Supplementary Table S1.** Demographics of participants.

| <b>Gene expression by qPCR</b> | <b>Graves' Disease</b> | <b>Health Control</b> |
|--------------------------------|------------------------|-----------------------|
| Participants (female /total n) | (29/36)                | (29/46)               |
| Age(years)                     | 34.0 ± 11.8            | 35.8 ± 10.2           |
| <b>Flow cytometry</b>          | <b>Graves' Disease</b> | <b>Health Control</b> |
| Participants (female /total n) | (24/29)                | (19/28)               |
| Age(years)                     | 33.2 ± 10.4            | 33.6 ± 9.4            |
| <b>ELISA of GPR15L</b>         | <b>Graves' Disease</b> | <b>Health Control</b> |
| Participants (female /total n) | (28/34)                | (21/33)               |
| Age(years)                     | 33.1 ± 10.3            | 34.7 ± 9.8            |
| <b>Correlation analysis</b>    | <b>Graves' Disease</b> | <b>Health Control</b> |
| Participants (female /total n) | (29/37)                | -                     |
| Age(years)                     | 33.1 ± 9.3             | -                     |

**Supplementary Table S2.** Primer sequences used in the study.

| <b>Gene</b>    | <b>Forward</b>         | <b>Reverse</b>         | <b>Product Size</b> |
|----------------|------------------------|------------------------|---------------------|
| GPR15          | GGGAGCTCACGCTGATTGAT   | TGGTAATGGGCACACAGCTT   | 166                 |
| GPR15L         | AGCCCCAACTCAACAAACCT   | GTTCTCCGCTGTCTGGAGTC   | 145                 |
| IL-4           | CCATGAGAAGGACACTCGCT   | CGTACTCTGGTTGGCTTCCTT  | 151                 |
| IL-10          | GTGAAAACAAGAGCAAGGCCG  | TCGCCACCCTGATGTCTCA    | 159                 |
| IL-17a         | CAATCCCACGAAATCCAGGATG | GGTGGAGATTCCAAGGTGAGG  | 156                 |
| IL-21          | AAGCTCCCAAGGTCAAGATCG  | AGCAGGAAAAAGCTGACCACT  | 155                 |
| IL-22          | GTGCAAAAGCTGAAGGACACA  | TTCTAGCAGGGAAAGGGGGT   | 157                 |
| IFN- $\gamma$  | AGGCTTTATCTCAGGGGCCA   | AGCACTGGCTCAGATTGCAG   | 157                 |
| $\beta$ -actin | CATTGCCGACAGGATGCAG    | CTCGTCATACTCCTGCTTGCTG | 169                 |

**Supplementary Table S3.** Antibodies used for flow cytometry.

| <b>Flow cytometry of PBMCs</b> | <b>Flouorochrome</b> | <b>Clone</b> | <b>Provider</b> |
|--------------------------------|----------------------|--------------|-----------------|
| Fixable Viability Dye          | eFluor 780           | -            | invitrogen      |
| CD3                            | BUV395               | SK7          | BD              |
| CD4                            | Brilliant Violet 605 | RPA-T4       | BioLegend       |
| CD8                            | PE-Cyanine7          | RPA-T8       | invitrogen      |
| CD19                           | eFluor 506           | HIB19        | invitrogen      |
| CD14                           | Brilliant Violet 510 | M5E2         | BioLegend       |
| CD16                           | eFluor 450           | eBioCB16     | invitrogen      |
| CD56                           | eF450                | TULY56       | invitrogen      |
| CD25                           | APC                  | BC96         | invitrogen      |
| CD127                          | PE-Cyanine7          | eBioRDR5     | invitrogen      |
| CD45RA                         | eFluor 450           | HI100        | invitrogen      |
| CCR7                           | APC                  | 3D12         | invitrogen      |
| GPR15                          | PE                   | 367902       | R&D systems     |

**Supplementary Table S4.** Clinical characteristics of IHC subjects in this study.

|                              | <b>Graves' Disease</b> | <b>Health Control</b> | <b>P value</b> |
|------------------------------|------------------------|-----------------------|----------------|
| Participants (female /total) | 5/5                    | 4/6                   | 0.46           |
| Age (years)                  | 34.2±7.4               | 51.8±11.3             | <0.05          |
| FT3 (pmol/L)                 | 3.33(3.32,3.35)        | 4.51(4.38,4.89)       | <0.01          |
| FT4 (pmol/L)                 | 11.18(6.11,12.30)      | 16.26(14.92,16.68)    | <0.01          |
| TSH (uIU/ml)                 | 7.19(4.62,9.77)        | 2.43(1.58,2.51)       | <0.05          |
| TrAb (IU/L)                  | 7.83(4.03,11.86)       | 0.58(0.45,0.83)       | 0.06           |
| TPOAb (IU/ml)                | 93.37(45.40, 137.70)   | 15.07(11.77, 18.28)   | 0.06           |

IHC: Immunohistochemistry

### Supplementary Figure S1

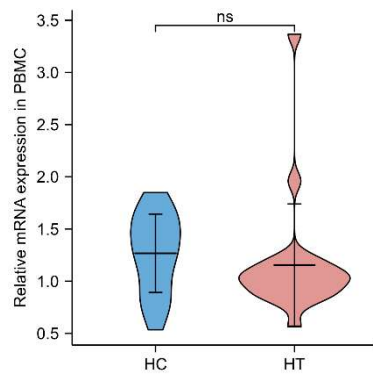

**Figure S1.** GPR15 mRNA expression was not change in Hashimoto's thyroiditis patients. HC: health controls, HT: Hashimoto's thyroiditis. (ns,  $p \geq 0.05$ )

### Supplementary Figure S2

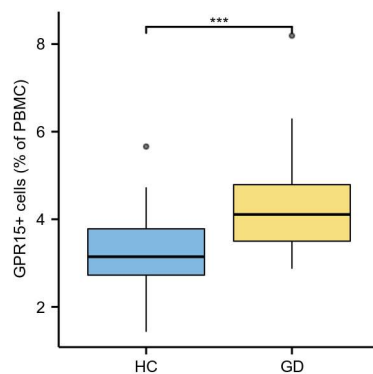

**Figure S2.** Frequency of GPR15+ cells among PBMCs in both groups. GPR15+: GPR15-expressing; HC: health controls, GD: Graves' disease. (\*\*\*,  $p < 0.001$ )

### Supplementary Figure S3

| Characteristics(frequency,%) | OR (95% CI)         |  | P value |
|------------------------------|---------------------|--|---------|
| Total GPR15+                 | 1.248(1.019–1.581)  |  | <0.05   |
| B cells GPR15+               | 0.933(0.791–1.090)  |  | 0.16    |
| T cells GPR15+               | 2.543(1.373–5.505)  |  | <0.01   |
| Th GPR15+                    | 1.491(1.034–2.287)  |  | <0.05   |
| Tc GPR15+                    | 1.556(0.873–2.937)  |  | 0.06    |
| Treg GPR15+                  | 1.146(0.824–1.624)  |  | 0.23    |
| NK cells GPR15+              | 8.066(1.733–57.250) |  | <0.01   |
| Monocytes GPR15+             | 2.843(1.516–7.069)  |  | <0.001  |

**Figure S3.** Odds ratios (OR) of the associations of GPR15+ cells frequency in PBMCs with GD after adjusting for age and gender.
